# Supplementary material for: Rescue of male fertility following faecal microbiota transplantation from alginate oligosaccharide-dosed mice
Source: HighWire-hosted journal article supplement (doi:10.1136/gutjnl-2020-323593), 2020-12-22

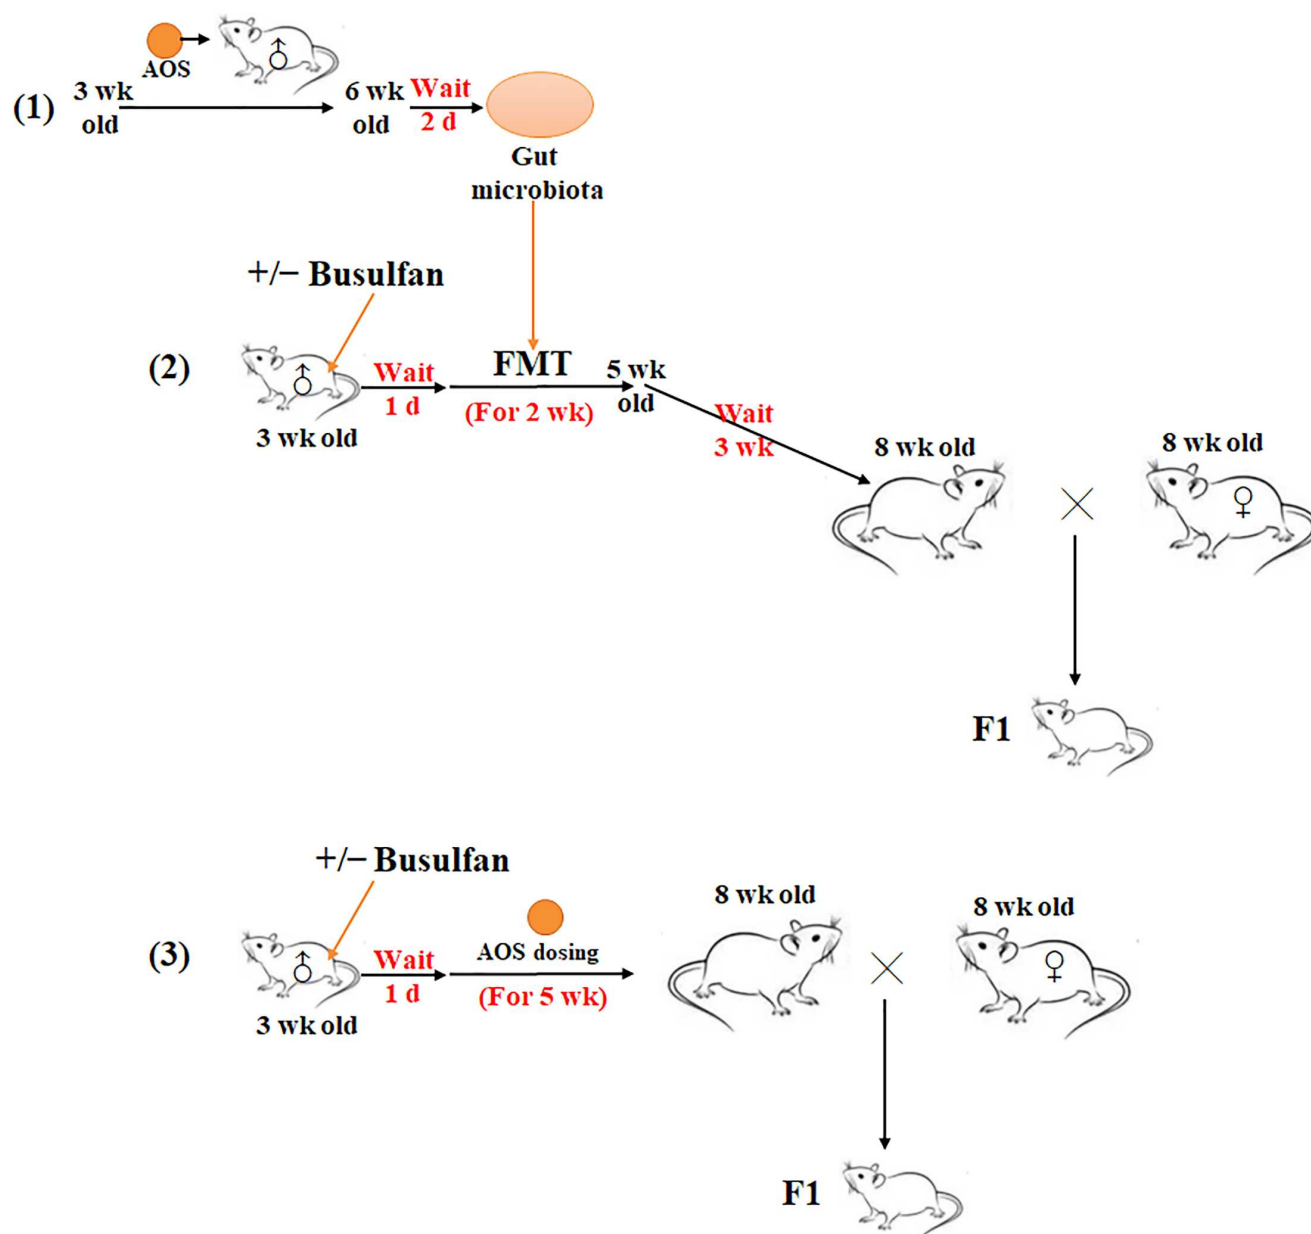

Supplement: gutjnl-2020-323593supp003_data_supplement.pdf [file gutjnl-2020-323593supp003_data_supplement.pdf]
